# Supplementary material
Source: publisher figshare collection journal article supplement (https://gsajournals.figshare.com/ndownloader/files/27462710)
Supplement: Supplementary file 1 [file 27462710]

## Sheet: polyA_24vs1_bact_species
species	levine_statistic	levine_pval	t_statistic	t_pval	t_padj	t_padj_reject	one_TOTAL1	one_POLYA2	TW4_TOTAL3	TW4_POLYA3	one_POLYA1	one_TOTAL2	one_POLYA3	TW4_POLYA1	TW4_TOTAL2	TW4_TOTAL1	TW4_POLYA2	one_TOTAL3
Chlamydia trachomatis	3.15029	0.150576	8.57737	0.00101478	0.00405912	TRUE	0.228333	0.965659	491.627	314.525	0.532867	0.850759	0.262584	417.992	435.668	400.874	474.495	0.409487
Escherichia coli	1.39184	0.303466	1.17641	0.30466	0.321354	FALSE	0.0962145	2.84889	4.5724	4.09343	0.304895	2.42765	0.214914	755.508	1064.72	111.195	84.4676	0.0889472
Mycoplasma hyorhinis	2.66346	0.178014	2.9164	0.0433992	0.0867983	FALSE	1.02628	0.863065	61.997	26.6779	2.53825	2.92411	1.02234	45.3479	104.927	208.736	86.1757	2.1748
Sphingorhabdus sp. Alg231-15	1.09821	0.353804	-1.13078	0.321354	0.321354	FALSE	1.71913	1.10037	0.787398	0.994581	5.85223	1.37499	1.77884	1.68407	2.31144	1.78288	0.95545	0.604048
Mycoplasma hyopneumoniae	NA	NA	NA	NA	NA	NA	0	0	0	0	0	0	0	0	0.0717049	0	0	0
Mycoplasma ovipneumoniae	NA	NA	NA	NA	NA	NA	0.135207	0	0	0	0	0	0	0	0.153564	0.603978	0	0
Pantoea sp.	NA	NA	NA	NA	NA	NA	0	0	0	0	0	0	0	0	0.123465	0	0	0.00452672

## Sheet: total_24_vs_1_bact_species
species	levine_statistic	levine_pval	t_statistic	t_pval	t_padj	t_padj_reject	blast_sseqid	blast_evalue	taxid	length	one_TOTAL1	one_POLYA2	TW4_TOTAL3	TW4_POLYA3	one_POLYA1	one_TOTAL2	one_POLYA3	TW4_POLYA1	TW4_TOTAL2	TW4_TOTAL1	TW4_POLYA2	one_TOTAL3
Chlamydia trachomatis	3.39164	0.139333	16.7286	7.48236e-05	0.000523765	TRUE	62585.9	2.22e-07	22625277	956786	0.228333	0.965659	491.627	314.525	0.532867	0.850759	0.262584	417.992	435.668	400.874	474.495	0.409487
Escherichia coli	1.36639	0.307342	1.16499	0.308763	0.455256	FALSE	1598.96	0	1027864	33327	0.0962145	2.84889	4.5724	4.09343	0.304895	2.42765	0.214914	755.508	1064.72	111.195	84.4676	0.0889472
Mycoplasma hyopneumoniae	1	0.373901	1	0.373901	0.455256	FALSE	100	2.06e-137	2099	270	0	0	0	0	0	0	0	0	0.0717049	0	0	0
Mycoplasma hyorhinis	2.56974	0.184188	2.82767	0.0474571	0.1661	FALSE	54569.1	7.46001e-105	8572226	575875	1.02628	0.863065	61.997	26.6779	2.53825	2.92411	1.02234	45.3479	104.927	208.736	86.1757	2.1748
Mycoplasma ovipneumoniae	1.25163	0.325887	1.11078	0.328933	0.455256	FALSE	300	4.75e-149	88686	1313	0.135207	0	0	0	0	0	0	0	0.153564	0.603978	0	0
Pantoea sp.	0.926771	0.39022	0.962689	0.39022	0.455256	FALSE	100	2.48e-56	69393	229	0	0	0	0	0	0	0	0	0.123465	0	0	0.00452672
Sphingorhabdus sp. Alg231-15	0.140349	0.72695	0.710538	0.516604	0.516604	FALSE	100	0	1922222	5441	1.71913	1.10037	0.787398	0.994581	5.85223	1.37499	1.77884	1.68407	2.31144	1.78288	0.95545	0.604048

## Sheet: total_24_vs_1_sig_bact_contig
levine_statistic	levine_pval	t_statistic	t_pval	t_padj	t_padj_reject	contig	name	superkingdom	kingdom	phylum	order	family	genus	species	blast_pident	blast_sseqid	blast_evalue	taxid	blast_stitle	filename	length	fasta	one_TOTAL1	one_POLYA2	TW4_TOTAL3	TW4_POLYA3	one_POLYA1	one_TOTAL2	one_POLYA3	TW4_POLYA1	TW4_TOTAL2	TW4_TOTAL1	TW4_POLYA2	one_TOTAL3
1.73446	0.258223	30.2072	7.15394e-06	0.00426017	TRUE	NODE_612_length_705_cov_3.823077_g583_i0	Chlamydia trachomatis	Bacteria		Chlamydiae	Chlamydiales	Chlamydiaceae	Chlamydia	Chlamydia trachomatis	gi|1566269852|gb|CP035484.1|	100	0	813	Chlamydia trachomatis strain tet9 chromosome, complete genome	all_unmapped_jgi_filtered	705	GGAAAACCAATGGGATAACTCTTGTTGTGAAATATTTAGATACTCACAAAGTTCTCCATCAGTAGGTTCTTTACCTAAAGTCTGTCTCAAAGAATCCATCGCATCAGCTAATCGATTGGCTCTTTGATAAACACTGCGTGGTACCCAATCCTGTTTGCGCAATCCATCAATAATCGCAGCTTTTATGATAAAAAGAGCATAGCTCTCGAATCGCTTGCTTTTTTCTGGATCAAAACGTTCGACAGCACGAATCAACCCTTCAACCCCCAGAGCATAAAGATCTTCCATCTTTACATGAGAAGGCATTCCTGAAGCAAGCCGATGCGCTACATTCTTTACTAAAGGAAGGTAGGATTCGATCAAAACATCCCTATGATGGATTTCTTTTGTCGACCAATA…	0	0	0.10911	0	0	0	0	0.174468	0.121313	0.111185	0.259931	0
1.80547	0.250213	19.4325	4.13438e-05	0.0123101	TRUE	NODE_786_length_546_cov_5.517312_g753_i0	Chlamydia trachomatis	Bacteria		Chlamydiae	Chlamydiales	Chlamydiaceae	Chlamydia	Chlamydia trachomatis	gi|1566269852|gb|CP035484.1|	100	0	813	Chlamydia trachomatis strain tet9 chromosome, complete genome	all_unmapped_jgi_filtered	546	GAAAAATTAGTCGATGGGAAGTATGATAAAAAACGGCACATTGCTTCATTTATCGGGCTTACTCCTATAGCTGCTTTATCGGATACTGCAGTTCCTTTAGTTATTCTTGTTTCTATCGACGATCCTGCTTATGGAGTAAGAGAAGACAGAACTAAGAACTATATGGGAGGACGGTGTGCTGCTCCTGTATTTTCGAGAATAGCTTCTCGAGTGCTGCCTTATTTAGGTGTGCCATTAGACGAGCAACTACACACCTATCGTGAAGAAGTTTCTCAATTAAAGCTGCTATATGAGGAATGGAATCGCAAATAGTGAGTTTATTTAGATATGAGTGAATGTGTTGAGGTCTGTTGCTTTGGGATGAGTGTGCAGCCTGGCATAAGGAAAGCGGGAGAGGAA…	0	0	0.122876	0	0	0	0	0	0.126876	0.144887	0.577196	0
1.31634	0.315209	36.8164	3.24976e-06	0.00387047	TRUE	NODE_264_length_1790_cov_2.975216_g248_i0	Mycoplasma hyorhinis	Bacteria		Tenericutes	Mycoplasmatales	Mycoplasmataceae	Mycoplasma	Mycoplasma hyorhinis	gi|1563681465|emb|LR214949.1|	100	0	2100	Mycoplasma hyorhinis strain NCTC10121 genome assembly, plasmid: 3	all_unmapped_jgi_filtered	1790	ATCAAATTCAAGATCAATTTGATTTTTGAATTTACTAAGATAACTAATTCCTTTTTTTCCAATAACAATAATGCGATCTTCTTCTTTTATTAAAGATTTTAACTTCTTAACTACATTGACATTATAAGCTCCACAAAGCCCAAGATCTGAAGTAATTACTATAAAAACTCTTGGTTTTGTAGTATCTAGGTCAAAAACATTAATTGAAGTAGTTTTTTTAATAATCGATAAAAAGATTTCATTTAGATTTGTGAAATATTGTGAAACTTGAACAAATTCTCTTCGTAGTTTAGGAATTTTAGCATTTGAGATCAGTTCCATTGCTTTGGTAATTTTTTCAGTATTTTTTATTTGTAAAAAGCGGGATTTTAACTTACTTAAAGCAACCATTTTACTGAG…	0	0	0.0896626	0	0	0	0	0	0.0856002	0.0934339	0.0896914	0.00249668
1.89613	0.240553	22.8811	2.16138e-05	0.00858067	TRUE	NODE_493_length_880_cov_2.770909_g465_i0	Mycoplasma hyorhinis	Bacteria		Tenericutes	Mycoplasmatales	Mycoplasmataceae	Mycoplasma	Mycoplasma hyorhinis	gi|1720621726|gb|CP035041.1|	100	0	2100	Mycoplasma hyorhinis strain JF5820 chromosome, complete genome	all_unmapped_jgi_filtered	880	TTTTTTCAAGAAAAGGGTATCACCTCAAGTAATTCTTGTTGTTTTTTTATTATTGATCTGAACTAAATTTATTTTTAAATATTACTTTAATTTTTGTAAAATAAGTATTTAAATTTTTAATTAGATAAAGTTGGCTAATTTTTTTATTTTGAACTATTAGATTAAAATAGAATTGCAAGAGTTGAATAATTGCTATAAAAACTCAACTAATTCAAGAGTAAGTCATCAACTCCAAGATGTTTTCTGTTCTTTCTCCTGCTTGGCCTACAATACTTATTTTTGAACCTAATAAAGACCCGCCAACTGAACCTAATAAAATTAATGTTTGAACTTGATTTTCAAAGTAAAATAGTAAAAATGATAAATAATCTTTTTTTATAGATGGAAAAACAAATTTGA…	0	0	0.0992421	0	0	0	0	0	0.0886611	0.10262	0	0.000996749
3.01437	0.157537	18.2281	5.32743e-05	0.0126899	TRUE	NODE_668_length_645_cov_7.996610_g636_i0	Mycoplasma hyorhinis	Bacteria		Tenericutes	Mycoplasmatales	Mycoplasmataceae	Mycoplasma	Mycoplasma hyorhinis	gi|1563681465|emb|LR214949.1|	100	0	2100	Mycoplasma hyorhinis strain NCTC10121 genome assembly, plasmid: 3	all_unmapped_jgi_filtered	645	CTTCCGATCTAAAGTTTAAAATTTACTCTACTTTACAAATTGAAAGGAAAAAATGCAAATTCCTTCTTGGCTAAGAATACTTTTAATTGCTTCAATTTTTGTTTCATTAGCTATTGGTGCTGCTGCTTTAGTTTGATCTCAAAAGAAAAAAAATAAAATAGTTAAACAAGTAATGGAAGAAAATAGAAAAAACATAAACAAGAGTTTAGTCATCCCTGAAGCTAAAATCGAAGCTGATTATATTGATAAATTGTTTAATGTCAACAACAATTGAGTCATTGAAGAATTAGAATTTATCATTAATACAATTTCGTTAAATAAATTAAATAATAATGTTTTTTTTGAAAAAGCTGGTGTTTGTTTTTTTCTTTCTTCAATTATTAATAAAACTAATAACTT…	0	0	0.240313	0	0	0	0	0	0.21609	0.199373	0	0.00323118

## Sheet: dark_polyA_24_vs_1_bact_species
	levine_statistic	levine_pval	t_statistic	t_pval	t_padj	t_padj_reject	taxid	length	one_TOTAL1	one_POLYA2	TW4_TOTAL3	TW4_POLYA3	one_POLYA1	one_TOTAL2	one_POLYA3	TW4_POLYA1	TW4_TOTAL2	TW4_TOTAL1	TW4_POLYA2	one_TOTAL3
Ahrensia sp. 13_GOM-1096m	NA	NA	NA	NA	NA	NA	1380380	243	0	0	0	0	0	0	0	0	0	0	0	0.00362454
Pseudoflavitalea rhizosphaerae	NA	NA	NA	NA	NA	NA	1884793	246	0	0	0	0	0	0	0	0	0	0.361224	0	0

## Sheet: dark_total_24_vs_1_bact_species
species	levine_statistic	levine_pval	t_statistic	t_pval	t_padj	t_padj_reject	taxid	length	one_TOTAL1	one_POLYA2	TW4_TOTAL3	TW4_POLYA3	one_POLYA1	one_TOTAL2	one_POLYA3	TW4_POLYA1	TW4_TOTAL2	TW4_TOTAL1	TW4_POLYA2	one_TOTAL3
Ahrensia sp. 13_GOM-1096m	1	0.373901	-1	0.373901	0.373901	FALSE	1380380	243	0	0	0	0	0	0	0	0	0	0	0	0.00362454
Pseudoflavitalea rhizosphaerae	1	0.373901	1	0.373901	0.373901	FALSE	1884793	246	0	0	0	0	0	0	0	0	0	0.361224	0	0

## Sheet: Doubledark_polyA_24_vs_1
levine_statistic	levine_pval	t_statistic	t_pval	t_padj	t_padj_reject	contig	length	fasta	one_TOTAL1	one_POLYA2	TW4_TOTAL3	TW4_POLYA3	one_POLYA1	one_TOTAL2	one_POLYA3	TW4_POLYA1	TW4_TOTAL2	TW4_TOTAL1	TW4_POLYA2	one_TOTAL3
NA	NA	NA	NA	NA	NA	NODE_1904_length_288_cov_1.643777_g1870_i0	288	GTTATTAACTTATAGTCTACATAAGAAACATGCCTTCTAAATTTTAAAAGATTTAGGATGAAGGTGTTTTGTTTTTATACACAGCCTTCATAATGAGGTAAAAACATCTAATTAACAAATGGTGCAGTAAAACTGTTTGCCCATTTATTTTGAGAAGGATGAAAACTGAACCTTATGCACTAAAACAAAACAGAAAAAAGAATCTGACTGAAAAGCACCCATGTGTGTAACTGCCCACTCAAAAATGTAGTCACTCTATTTTCTTAACAACTGACCTACTAAGTTTTC	0	0	0	0	0	0	0	0	0	0	0	0.00628002
NA	NA	NA	NA	NA	NA	NODE_2717_length_246_cov_1.005236_g2683_i0	246	TTCAATTTAAAATGTGTTGAGTCATGCTCTGGATTAATGTTGTGTCACTCTTTTAAATATGTCTTTTGGACGTTTAAATTTAATTTGAGAAGGATTGATTAAATTTTCACGAGAAAGTCTTAAATTAGTTGTAGAGGATCAATTGTCTGTATTCTCATTATTATTTTATCATATCATTGAGATGAAATTTTTCTCTCGTTTCATATCGATGTAACGACTCTTTGCAAGTTAGTCCGTCAAAGTCTC	0	0	0	0	0	0	0	0	0	0.361224	0	0
NA	NA	NA	NA	NA	NA	NODE_2826_length_244_cov_1.015873_g2792_i0	244	TTTTACGTATGGTCACATATGCGACGGTTGATTCTTTAACTCTTAAATTACCACGTTTGTTCGTTCTTTCCCCTTTAGACTATAACGTAGTTTTTAACAACACGAATCTAAAAAGTCAAGTTAATTTTTGAAAATGACGTAATATATAATCTAGGATTTAGACTGTTATTCATGTCGATGTTCTATCACTCTCGGTGACAATTTGTACGGTAACTAGAGAGTTAATAGGAAGGTACGGTGATTT	0	0	0	0	0	0	0	0	0	0.361224	0	0
NA	NA	NA	NA	NA	NA	NODE_2832_length_244_cov_1.015873_g2798_i0	244	GTTTTTAGGAATTTATCGTACTTTGTTTGAATGTGATAATCCAGCGTCGGAAATACTTTAATTACTTCGCTCTGCAATATGTTTCTTCATTAATATCTCCTGATATTTTATATAGTTTTGGGCAGGAGTGGCTACATTTTATTTGAGAACAAGTTTCATATCAAGCGATCAGAATATCTGTCTCGATAGGGATTTATGTTCTATTTTATAGGCGATTCCTTAATTATCTAGGTTCACTTCCGAT	0	0	0	0	0	0	0	0	0.0414568	0	0	0
NA	NA	NA	NA	NA	NA	NODE_2992_length_242_cov_1.026738_g2958_i0	242	CGAACGTAAGCGCTTACCTGATAGATATAAACGCTACAAAAGAGAACGATAACTATAAGATTCTAGATTAAGTTTAATCAATAGTACTGTCTTGAACCGTAAAGTAGCAATAGTGAAATATGATAAGTAACGGAAACTATTCGGATGGAGCGGAATATCCACAACCGACGTCAAGAGACTAAGGGAACCACACCGCGTACATTAGACATAGAGCCACTAATAAAAGAAGAAATAAAAGAATG	0	0	0	0	0	0	0	0	0.0414568	0	0	0
NA	NA	NA	NA	NA	NA	NODE_3005_length_241_cov_2.064516_g2971_i0	241	GAAATAATAGTTTTCCCTTACCACAATAACATGGAAACATTAAAAAGTAATAAATCAATATTAAAAGCTAAAACCTACAAAACTTCTTCTCGTATCTTTAACAACATTTTCAAAACAATTTAGACTGTCTCGCAGCTATTTATAATATCCGAGTAAAGAATTAAATAATTTACCTCTAGTTAAATCCTAGAACCAAGTCGAAAGTAATGCTATCCCGAGGAAAATGTGATGAACAACGTCG	0	0	0	0	0	0	0	0	0	0.452654	0	0

## Sheet: Doubledark_total_24_vs_1
levine_statistic	levine_pval	t_statistic	t_pval	t_padj	t_padj_reject	contig	length	fasta	one_TOTAL1	one_POLYA2	TW4_TOTAL3	TW4_POLYA3	one_POLYA1	one_TOTAL2	one_POLYA3	TW4_POLYA1	TW4_TOTAL2	TW4_TOTAL1	TW4_POLYA2	one_TOTAL3
1	0.373901	-1	0.373901	0.373901	FALSE	NODE_1904_length_288_cov_1.643777_g1870_i0	288	GTTATTAACTTATAGTCTACATAAGAAACATGCCTTCTAAATTTTAAAAGATTTAGGATGAAGGTGTTTTGTTTTTATACACAGCCTTCATAATGAGGTAAAAACATCTAATTAACAAATGGTGCAGTAAAACTGTTTGCCCATTTATTTTGAGAAGGATGAAAACTGAACCTTATGCACTAAAACAAAACAGAAAAAAGAATCTGACTGAAAAGCACCCATGTGTGTAACTGCCCACTCAAAAATGTAGTCACTCTATTTTCTTAACAACTGACCTACTAAGTTTTC	0	0	0	0	0	0	0	0	0	0	0	0.00628002
1	0.373901	1	0.373901	0.373901	FALSE	NODE_2717_length_246_cov_1.005236_g2683_i0	246	TTCAATTTAAAATGTGTTGAGTCATGCTCTGGATTAATGTTGTGTCACTCTTTTAAATATGTCTTTTGGACGTTTAAATTTAATTTGAGAAGGATTGATTAAATTTTCACGAGAAAGTCTTAAATTAGTTGTAGAGGATCAATTGTCTGTATTCTCATTATTATTTTATCATATCATTGAGATGAAATTTTTCTCTCGTTTCATATCGATGTAACGACTCTTTGCAAGTTAGTCCGTCAAAGTCTC	0	0	0	0	0	0	0	0	0	0.361224	0	0
1	0.373901	1	0.373901	0.373901	FALSE	NODE_2826_length_244_cov_1.015873_g2792_i0	244	TTTTACGTATGGTCACATATGCGACGGTTGATTCTTTAACTCTTAAATTACCACGTTTGTTCGTTCTTTCCCCTTTAGACTATAACGTAGTTTTTAACAACACGAATCTAAAAAGTCAAGTTAATTTTTGAAAATGACGTAATATATAATCTAGGATTTAGACTGTTATTCATGTCGATGTTCTATCACTCTCGGTGACAATTTGTACGGTAACTAGAGAGTTAATAGGAAGGTACGGTGATTT	0	0	0	0	0	0	0	0	0	0.361224	0	0
1	0.373901	1	0.373901	0.373901	FALSE	NODE_2832_length_244_cov_1.015873_g2798_i0	244	GTTTTTAGGAATTTATCGTACTTTGTTTGAATGTGATAATCCAGCGTCGGAAATACTTTAATTACTTCGCTCTGCAATATGTTTCTTCATTAATATCTCCTGATATTTTATATAGTTTTGGGCAGGAGTGGCTACATTTTATTTGAGAACAAGTTTCATATCAAGCGATCAGAATATCTGTCTCGATAGGGATTTATGTTCTATTTTATAGGCGATTCCTTAATTATCTAGGTTCACTTCCGAT	0	0	0	0	0	0	0	0	0.0414568	0	0	0
1	0.373901	1	0.373901	0.373901	FALSE	NODE_2992_length_242_cov_1.026738_g2958_i0	242	CGAACGTAAGCGCTTACCTGATAGATATAAACGCTACAAAAGAGAACGATAACTATAAGATTCTAGATTAAGTTTAATCAATAGTACTGTCTTGAACCGTAAAGTAGCAATAGTGAAATATGATAAGTAACGGAAACTATTCGGATGGAGCGGAATATCCACAACCGACGTCAAGAGACTAAGGGAACCACACCGCGTACATTAGACATAGAGCCACTAATAAAAGAAGAAATAAAAGAATG	0	0	0	0	0	0	0	0	0.0414568	0	0	0
1	0.373901	1	0.373901	0.373901	FALSE	NODE_3005_length_241_cov_2.064516_g2971_i0	241	GAAATAATAGTTTTCCCTTACCACAATAACATGGAAACATTAAAAAGTAATAAATCAATATTAAAAGCTAAAACCTACAAAACTTCTTCTCGTATCTTTAACAACATTTTCAAAACAATTTAGACTGTCTCGCAGCTATTTATAATATCCGAGTAAAGAATTAAATAATTTACCTCTAGTTAAATCCTAGAACCAAGTCGAAAGTAATGCTATCCCGAGGAAAATGTGATGAACAACGTCG	0	0	0	0	0	0	0	0	0	0.452654	0	0
